# Supplementary material
Source: publisher figshare collection journal article supplement (https://acs.figshare.com/ndownloader/files/24311065)

Supporting Information.

Non-rigid Diarylmethyl Analogs of Baloxavir as CAP-  
Dependent Endonuclease Inhibitors of Influenza  
Viruses

*Andrei A. Ivashchenko, Oleg D. Mitkin, Jeremy C. Jones, Alexander V. Nikitin, Angela G.*

*Koryakova, Alexey Ryakhovskiy, Ruben N. Karapetian, Dmitry V. Kravchenko, Vladimir*

*Aladinskiy, Irina A. Leneva, Irina N. Falynskova, Ekaterina A. Glubokova, Elena A.*

*Govorkova, and Alexandre V. Ivachtchenko\**

**Table S1. 5a and 5d protection of MDCK cells from death caused by influenza A and B virus <sup>a</sup>**

| Compound  | EC <sub>50</sub> ± SEM, nM <sup>b</sup> |                           |                                          |                                        |
|-----------|-----------------------------------------|---------------------------|------------------------------------------|----------------------------------------|
|           | A/Denmark/524/2009<br>(H1N1)pdm09       | A/Fukui/20/2004<br>(H3N2) | B/Brisbane/60/2008<br>(Victoria Lineage) | B/Florida/4/2006<br>(Yamagata lineage) |
| <b>5a</b> | 5.1 ± 3.9                               | 3.6 ± 1.7                 | 9.6 ± 1.0                                | 5.1 ± 3.9                              |
| <b>5d</b> | 12.5 ± 4.9                              | 10.0 ± 2.8                | 10.5 ± 1.3                               | 28.3 ± 6.7                             |
| <b>3</b>  | 1.1 ± 0.5                               | 0.4 ± 0.2                 | 5.0 ± 0.6                                | 1.2 ± 0.5                              |

<sup>a</sup> The cells were infected with the corresponding virus at a MOI = 0.001

<sup>b</sup> The EC<sub>50</sub>, 50% effective concentration, was assessed 72 or 96 hours post infection. 3 or 4 independent dose-response curves were averaged and mean ± SEM values presented.

**Table S2. PK parameters of 3, 5a, 5b, 5d, and 5e in CD-1 female mice upon IV administration.**

| PK in mice, IV (2 mg/kg) |         |          |       |       |        |       |
|--------------------------|---------|----------|-------|-------|--------|-------|
|                          |         | Compound |       |       |        |       |
| Parameter                | Units   | 5a       | 5b    | 5d    | 5e     | 3     |
| kel                      | 1/h     | 0.62     | 0.57  | 0.50  | 0.5    | 0.24  |
| T1/2                     | h       | 1.11     | 1.21  | 1.39  | 1.3    | 2.83  |
| Tmax                     | h       | 0.083    | 0.083 | 0.083 | 0.1    | 0.25  |
| Cmax                     | ng/ml   | 654      | 511   | 600   | 977.7  | 198   |
| C0                       | ng/ml   | 815      | 522   | 642   | 1073.8 | 156   |
| AUClast                  | h*ng/ml | 844      | 1073  | 927   | 2213.9 | 354   |
| AUCinf                   | h*ng/ml | 931      | 1085  | 937   | 2241.0 | 412   |
| Vz                       | ml/kg   | 3446     | 3231  | 4279  | 1655.0 | 16747 |
| Cl                       | ml/h/kg | 2147     | 1844  | 2134  | 892.4  | 4101  |
| MRTlast                  | h       | 2.02     | 1.24  | 1.59  | 1.9    | 2.12  |

### Validation of Glide Emodel vs pEC<sub>50</sub> for Known Influenza Virus CEN inhibitors.

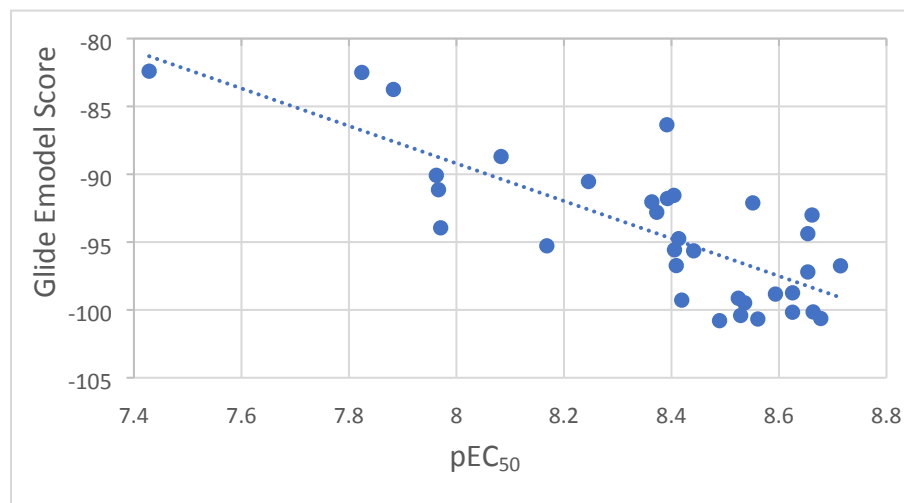

A virtual library containing BXA (**3**) and its potent structural analogues was used to validate the docking protocol. 2D structures of these compounds and their CEN inhibitory activity (EC<sub>50</sub>) were manually mined from the patent application [1]. Collected structures were docked into the model of IFV cap-dependent endonuclease and were ranked by Glide Emodel score (Figure).

Maestro, release 2015-2, was used for the molecular modelling. The X-ray structure of CEN and BXA complex was downloaded from the Protein Data Bank (PDB code: 6FS6). The target structure was pre-processed using Protein Preparation Wizard tool. Pre-processing included addition of missing hydrogens, bonds assignment, protonation of BXA and generation of charge states for the cofactors (Epik, at pH of  $7 \pm 2$ ), removal of water molecules, which form less than three hydrogen bonds, and H-bonds optimization (PROPKA, at pH 7). Next, a grid with BXA structure at the centre, was generated using Receptor Grid Generation and was applied for further docking simulations. 2D structures of the ligands were preliminary pre-processed with LigPrep tool. The stereo configurations were manually inspected, and the required isomers were selected. Docking simulations were performed exploiting Glide SP with the post-docking minimization. Compounds were ranked by the values of Glide Emodel scoring function and manually inspected.

Reference:

1. Makoto, K.; Tomita, K.; Akiyama, T.; Okano, A.; Miyagawa, M. Substituted polycyclic pyridone derivative and prodrug thereof. U.S. Patent Appl. US 2018/0118760, May 3, 2018.

## HPLC-MS traces

### Compound 5a

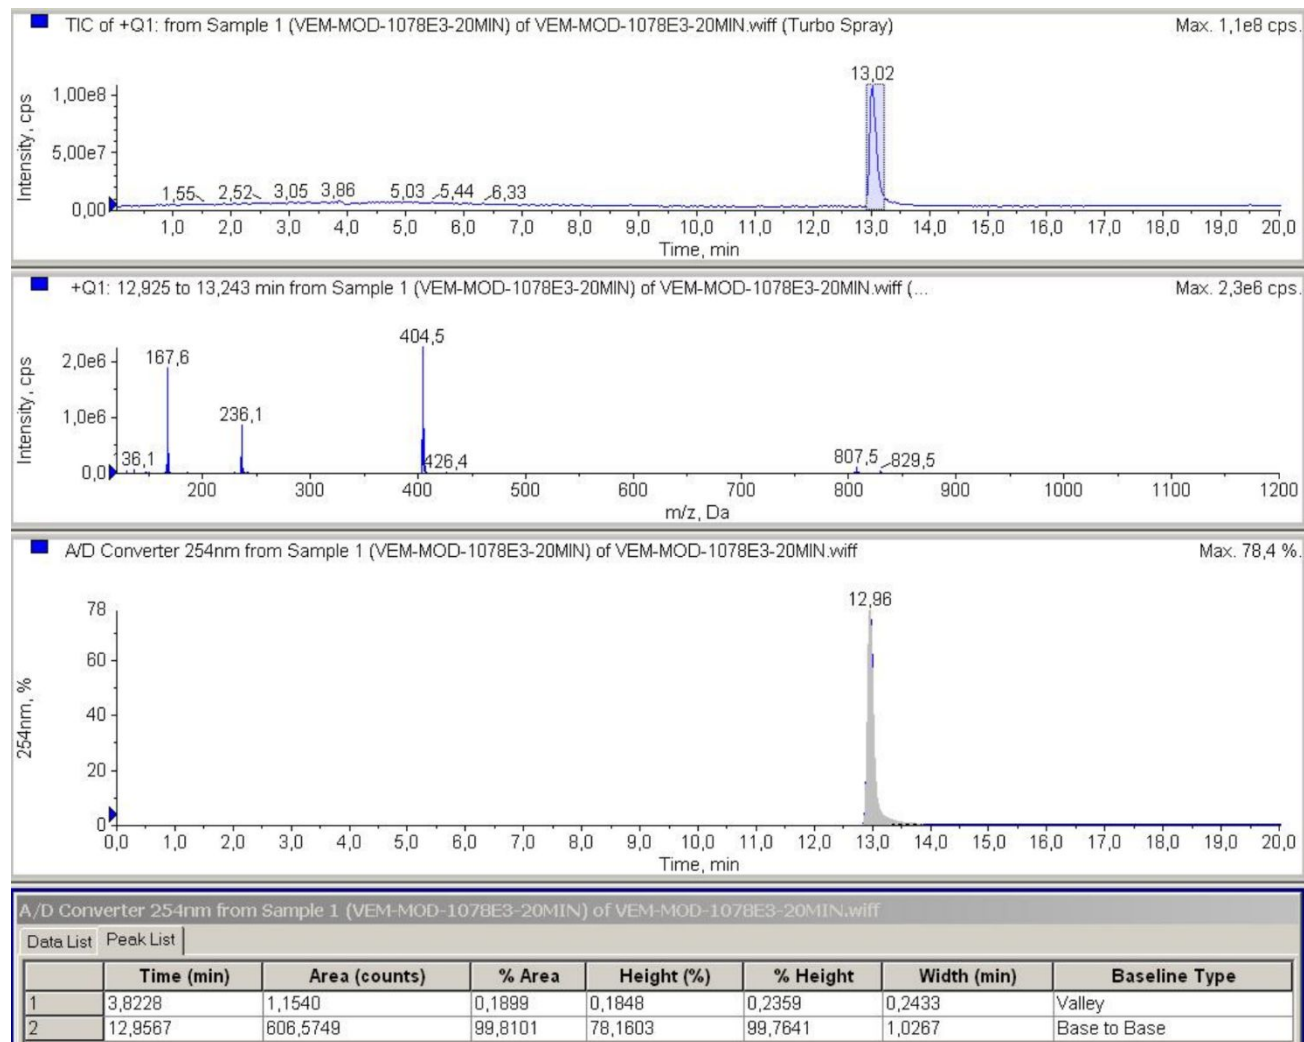

## Compound 5b

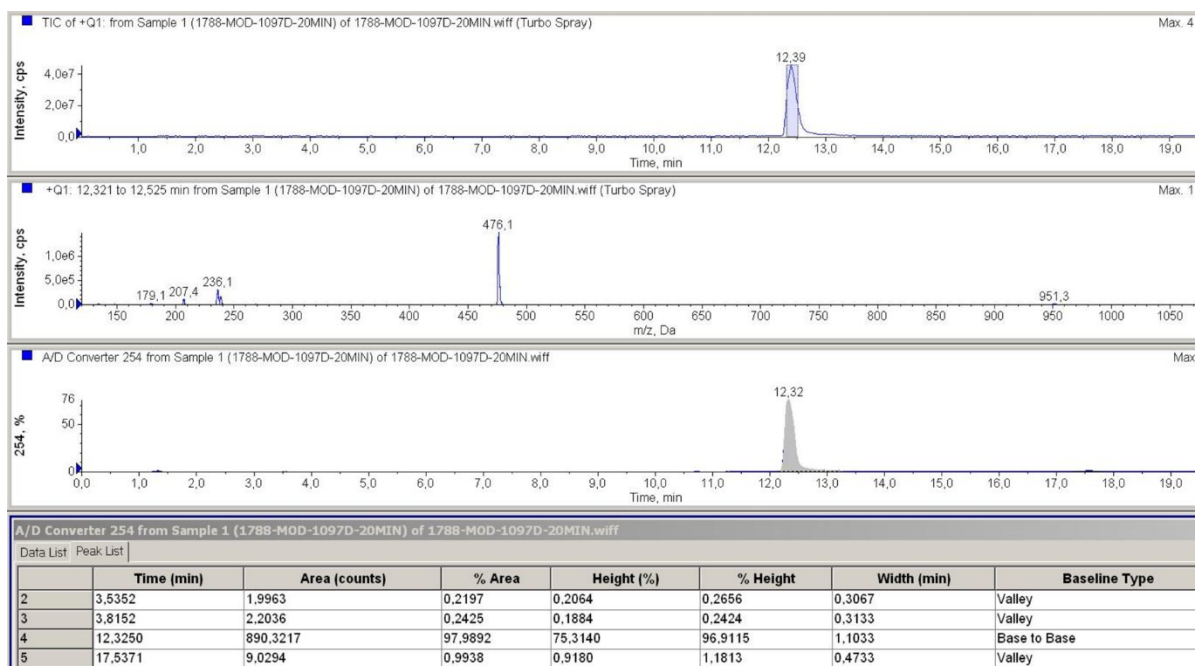

## Compound 5c

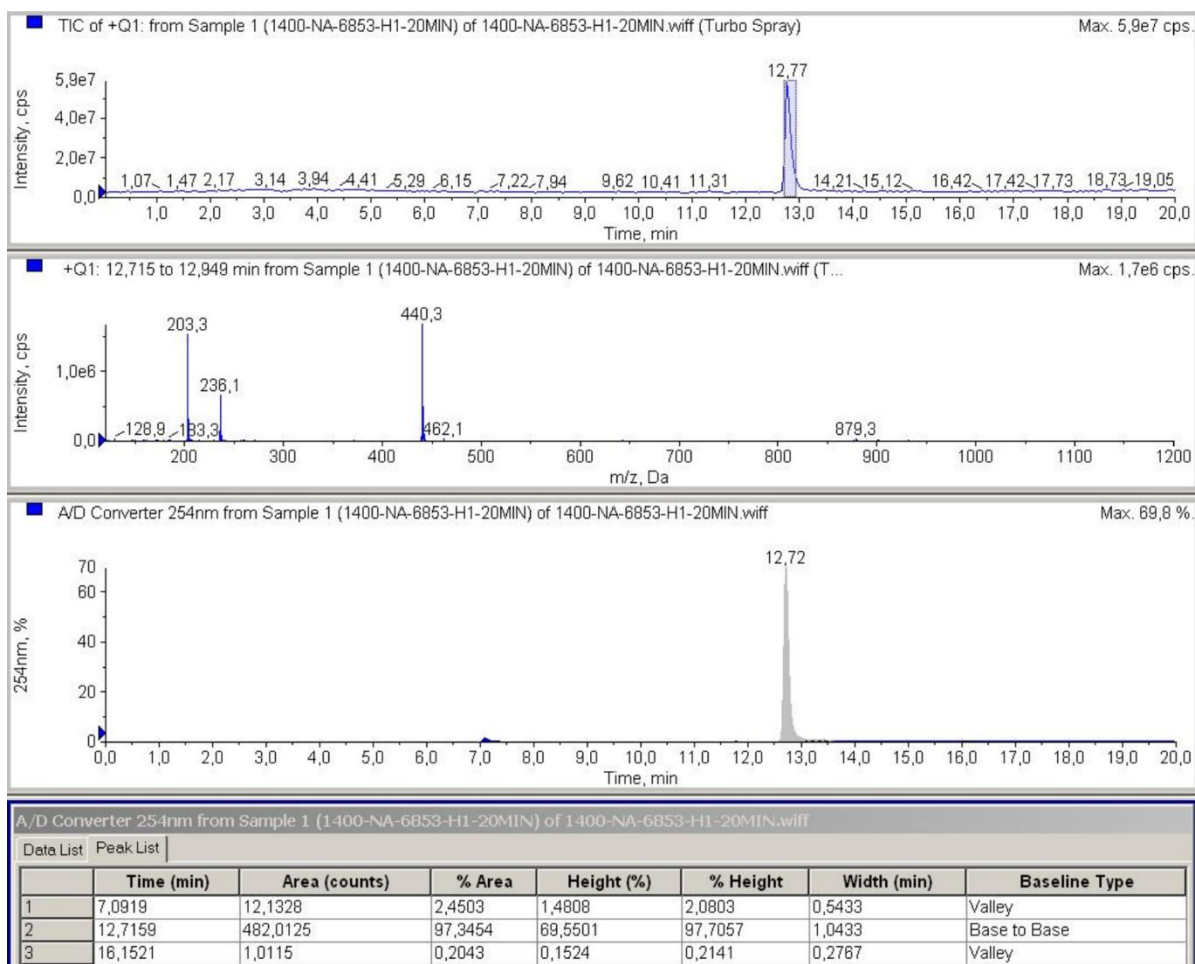

## Compound 5d

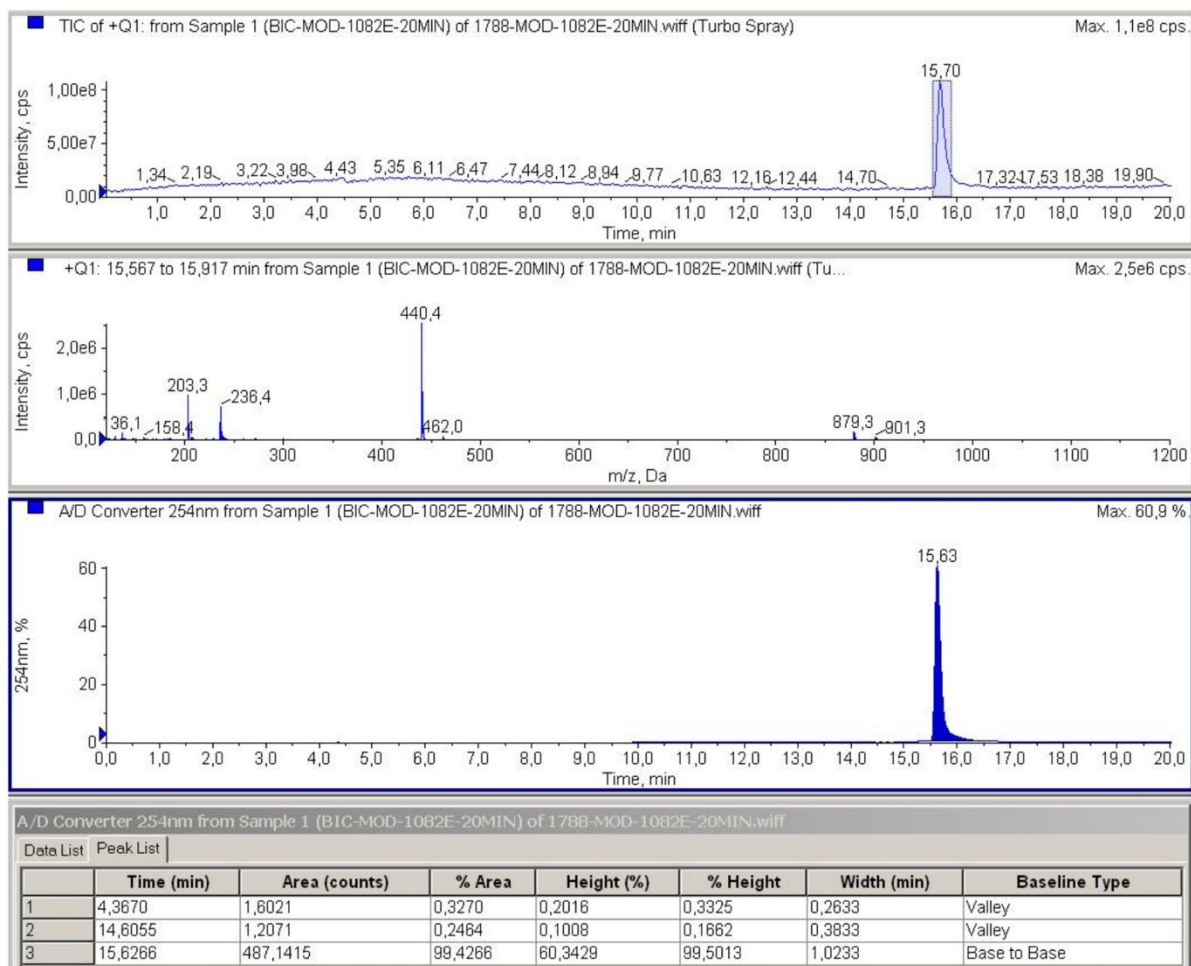

## Compound 5e

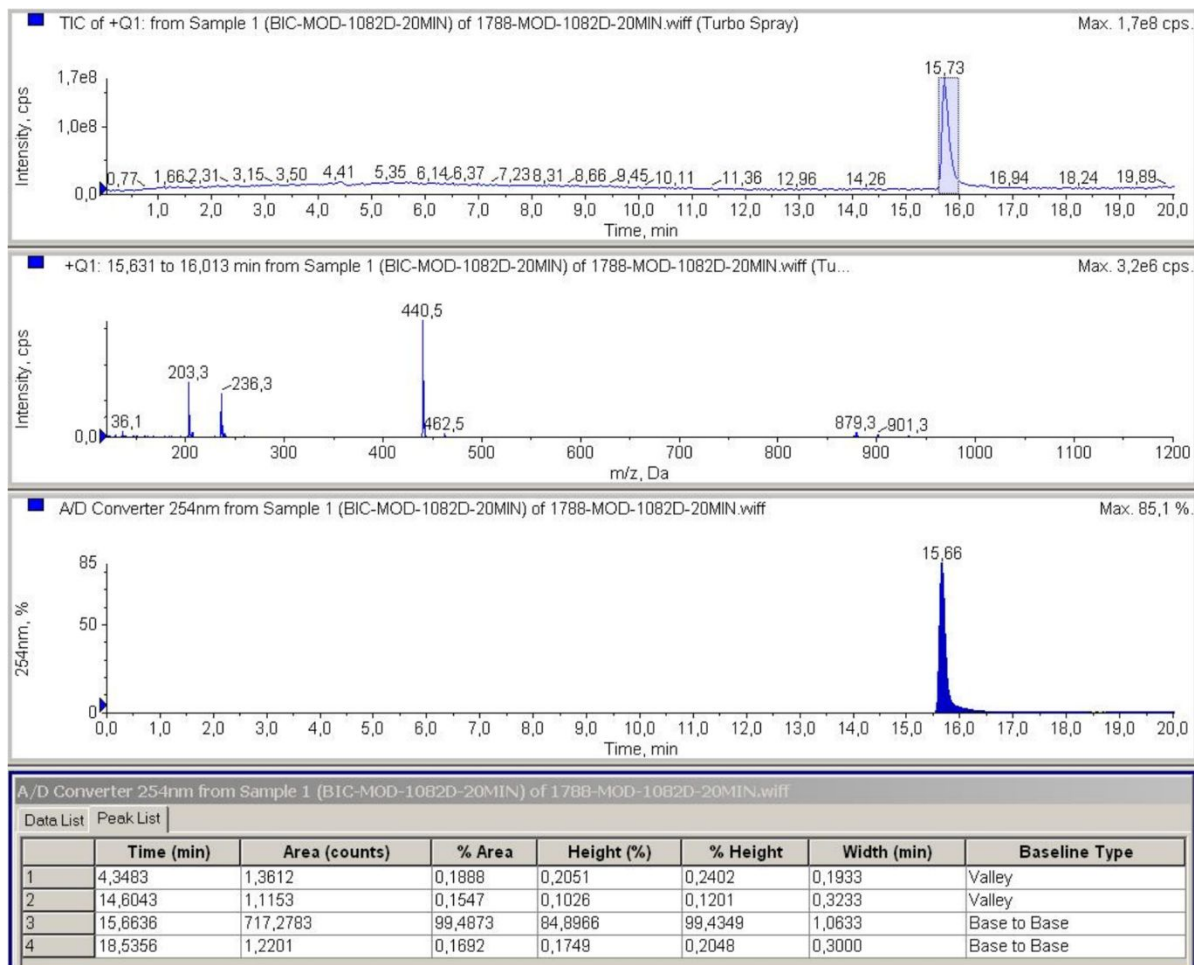



## Compound 5f

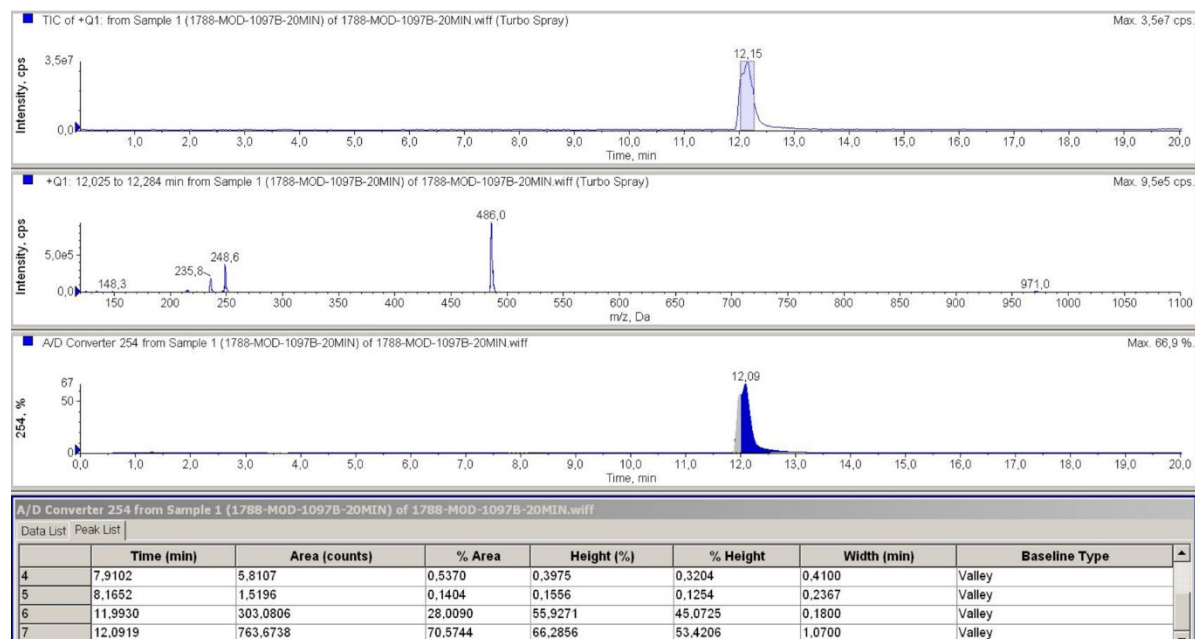

## Compound 5g

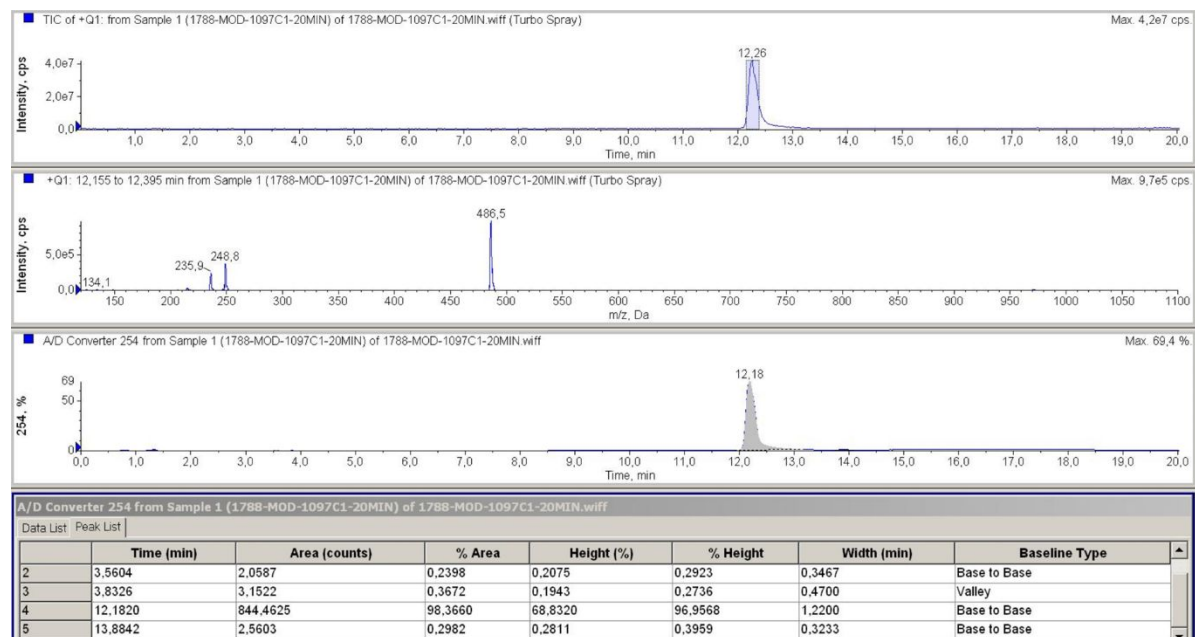

## Compound 6a

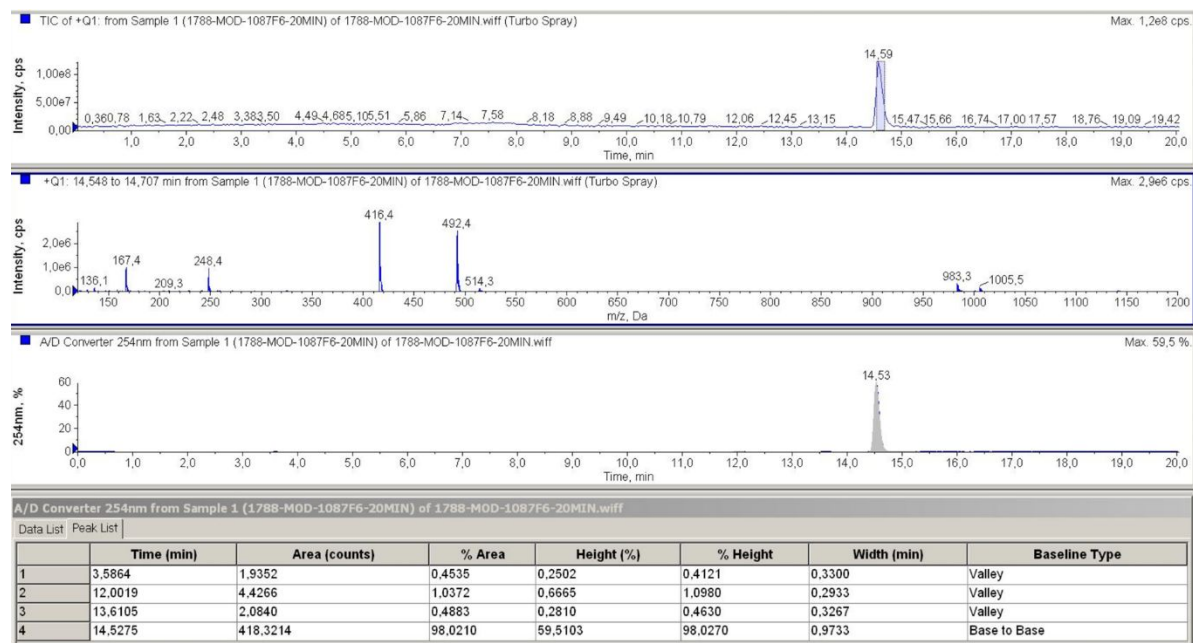

## Compound 6b

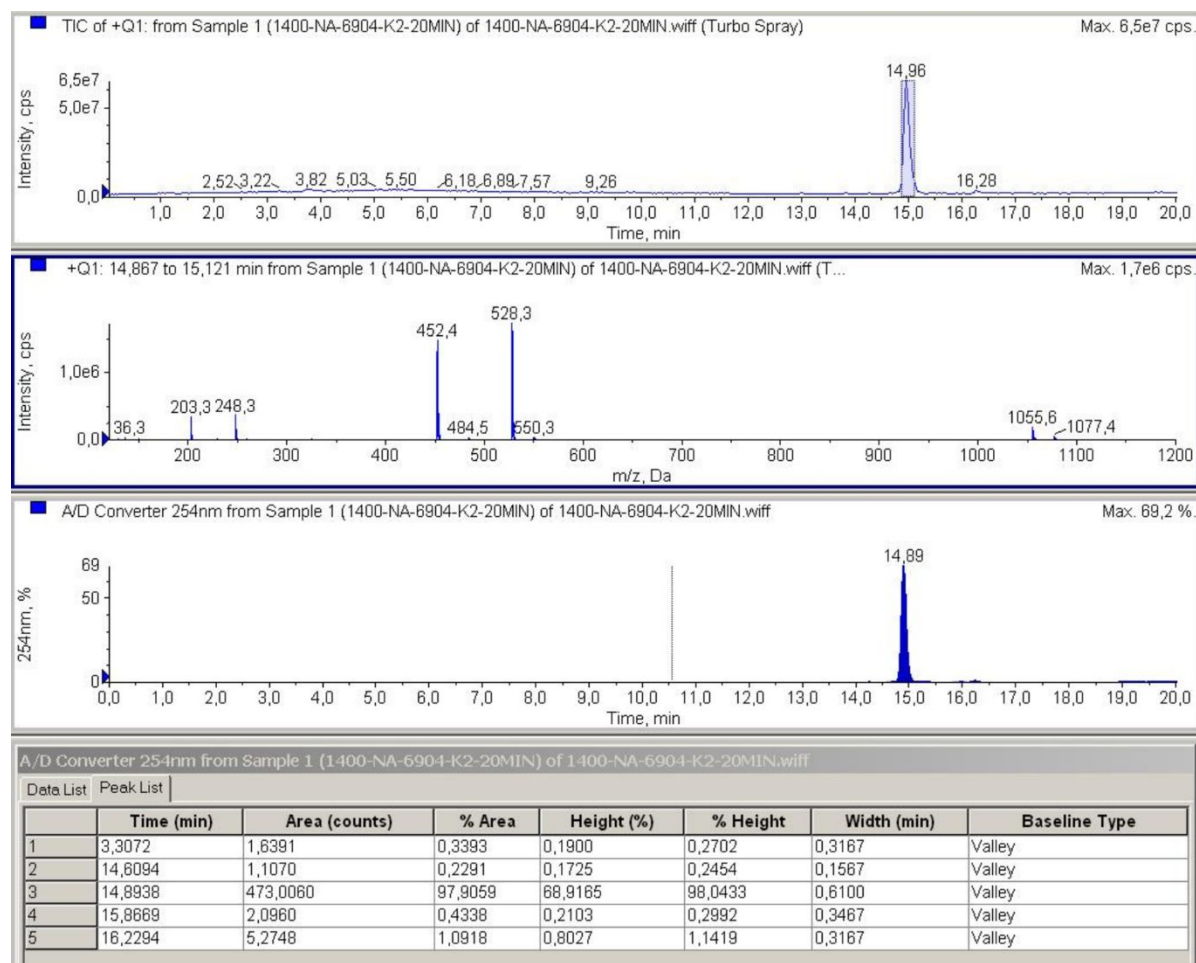

## Compound 6d

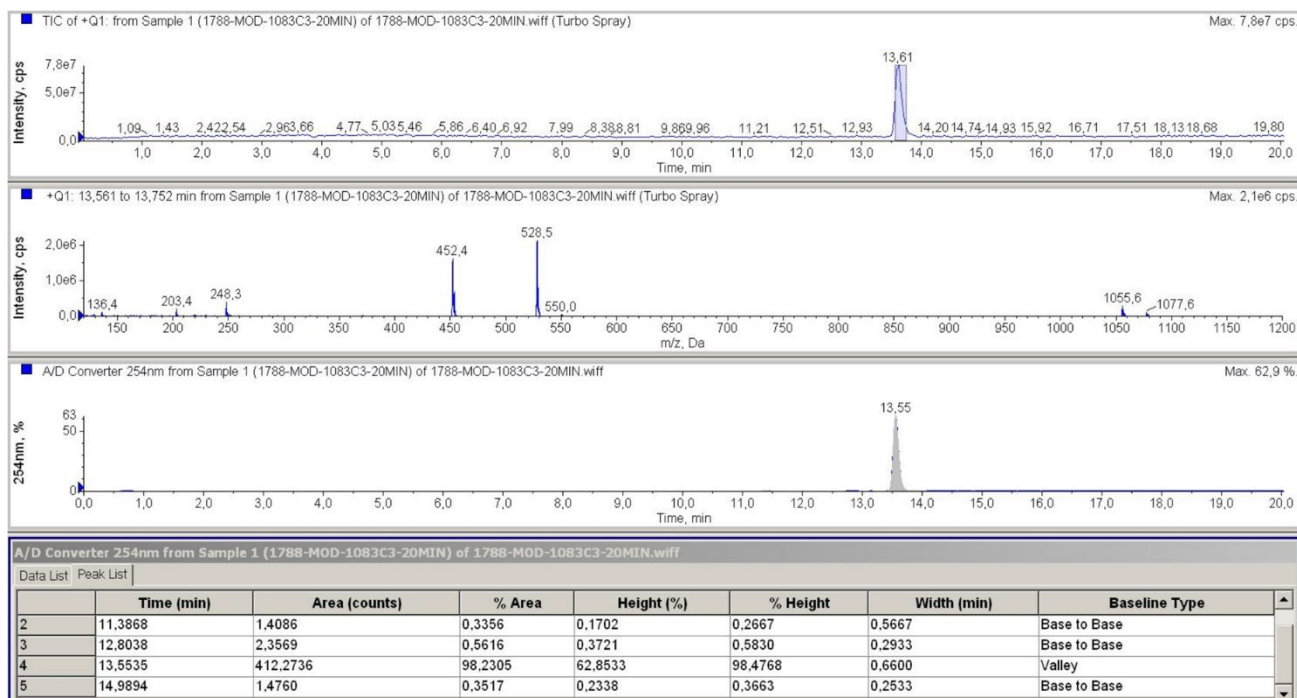

## Compound 6

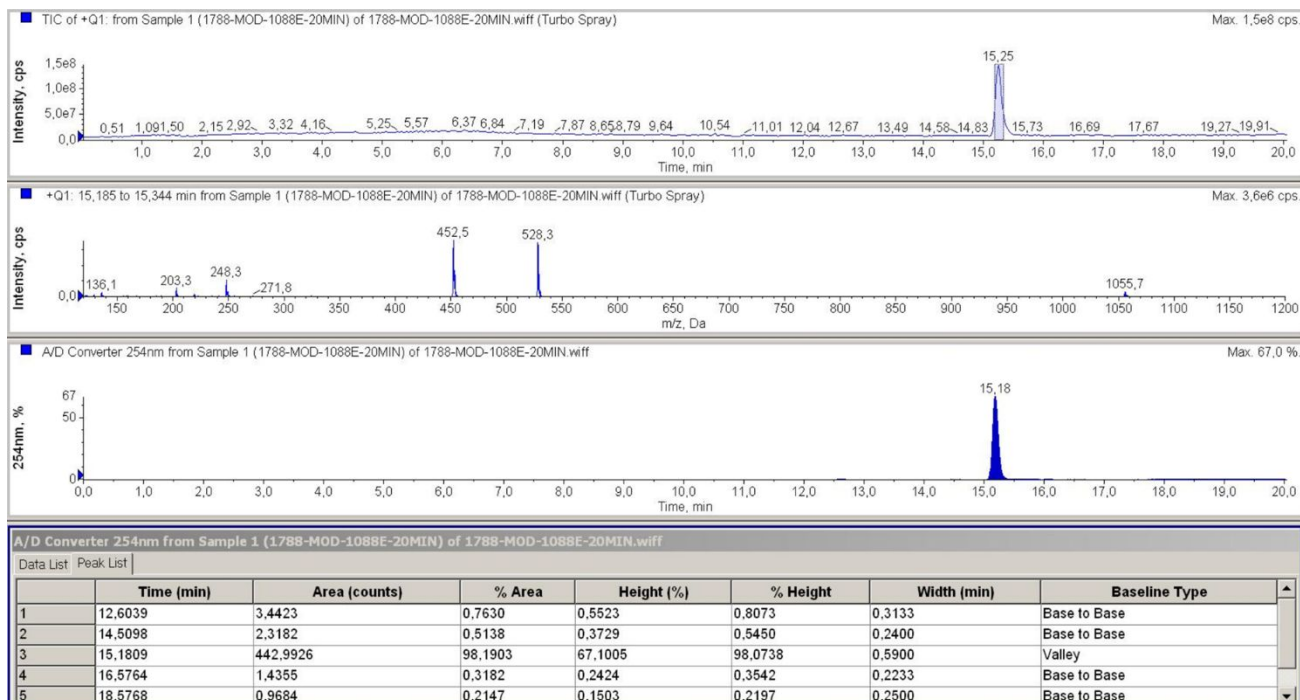

Supplement: Supplementary file 1 [file 24311065]
